# Supplementary material for: The 3.6 ka Aniakchak tephra in the Arctic Ocean: a constraint on the Holocene radiocarbon reservoir age in the Chukchi Sea
Source: Copernicus journal article supplement (doi:10.5194/cp-13-303-2017), 2017-04-05
Supplement: Supplementary file 1 [file cp-13-303-2017-supplement.zip]

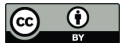

## *Supplement of*

# **The 3.6 ka Aniakchak tephra in the Arctic Ocean: a constraint on the Holocene radiocarbon reservoir age in the Chukchi Sea**

**Christof Pearce et al.**

*Correspondence to:* Christof Pearce ([christof.pearce@geo.su.se](mailto:christof.pearce@geo.su.se))

- [cp-13-303-2017-supplement-title-page.pdf](#)
- [Pearce et al Aniakchak\\_Supplementary\\_rev.xlsx](#)

The copyright of individual parts of the supplement might differ from the CC-BY 3.0 licence.
